# Supplementary material
Source: ML conference proceedings conference paper supplement (https://proceedings.neurips.cc/paper_files/paper/2018/hash/6ea9ab1baa0efb9e19094440c317e21b-Abstract.html)
Supplement: Supplementary file [file 6ea9ab1baa0efb9e19094440c317e21b-Supplemental.zip]

This is the supplementary material for the NIPS 2018 paper: “Efficient Algorithms for Non-convex Isotonic Regression through Submodular Optimization”, by Francis Bach.

## A Parametric max-flow formulation for isotonic regression

In this section, we provide descriptions of algorithms for isotonic regression with the quadratic cost, that is, the problem of solving:

$$\min_{x \in \mathbb{R}^n} \frac{1}{2} \|x - z\|_2^2 \text{ such that } \forall (i, j) \in E, x_i \geq x_j, \quad (7)$$

For more details, see [22, 1]. Note that in this section, we strongly leverage the submodular properties of cut functions.

The problem in Eq. (7) can be solved by considering the following penalized problem

$$\min_{x \in \mathbb{R}^n} \frac{1}{2} \|x - z\|_2^2 + \lambda \sum_{(i,j) \in E} (x_j - x_i)_+, \quad (8)$$

for a large value of  $\lambda$ . Note that as opposed to the general submodular case, having a large value does not impact running-time complexity because we are using combinatorial algorithms for min-cut / max-flow.

The function  $g(x) = \sum_{(i,j) \in E} (x_j - x_i)_+$  is known to be the continuous *Lovász* extension of the cut function defined on  $\{0, 1\}^n$  with the exact same formula (see, e.g., [1]). Thus the problem in Eq. (8) is equivalent to

$$\min_{x \in \mathbb{R}^n} \frac{1}{2} \|x\|^2 - x^\top z + g(x), \quad (9)$$

which is the minimization of the Lovász extension  $g(x)$  penalized by a separable function. This is known to be equivalent to the parameterized family of binary submodular function minimization problems

$$\min_{x \in \{0,1\}^n} \alpha \cdot \mathbf{1}_n^\top x - x^\top z + g(x), \quad (10)$$

for  $\alpha \in \mathbb{R}$ . More precisely (see, e.g., [1, Prop. 8.3]), one can obtain the unique solution  $x \in \mathbb{R}^n$  of Eq. (9) from solutions  $x_\alpha \in \{0, 1\}^n$  of Eq. (10) through  $x_i = \sup \{ \alpha \in \mathbb{R}, (x_\alpha)_i = 1 \}$ .

Since the problem in Eq. (10) is a minimum cut problem, because of the equivalence with maximum flow we obtain a parametric max-flow problem.

## B Pseudo-codes of algorithms

The paper proposes two discretization schemes: the naive one in Section 4.2 (which is the same as in [2] except with the added isotonic constraints) and the new improved one in Section 5.

### B.1 Naive discretization scheme

We consider the discretization of  $[0, 1]$  with  $k$  elements  $\frac{i}{k-1}$ ,  $i \in \{0, \dots, k-1\}$ . This defines a function  $F$  on  $\{0, \dots, k-1\}^n$  as

$$F(i_1, \dots, i_n) = H\left(\frac{i_1}{k-1}, \dots, \frac{i_n}{k-1}\right).$$

Following [2], we can define an extension in a space of product measures on  $\{0, \dots, k-1\}$ . We can parameterize that space through  $\rho \in \mathbb{R}^{n \times (k-1)}$  which corresponds to the  $n$  reverse cumulative distribution functions; minimizing  $F$  (which leads to an approximate minimizer of  $H$ ) is equivalent to minimizing a convex extension  $f_\downarrow(\rho)$  with respect to  $\rho \in [0, 1]^n \cap \mathcal{S} \cap \mathcal{T}$  ( $\mathcal{S}$  corresponds to the monotonicity of the cumulative distributions functions and  $\mathcal{T}$  to the additional isotonic constraint). The only difference with the non-isotonic case is the extra-projection step onto  $\mathcal{T}$ .

**Projected subgradient method.** A subgradient of  $f_\downarrow$  may be obtained by the greedy algorithm of [2], which sorts all values of the components of the matrix  $\rho$ , and computes differences of values of  $F$  (and thus of  $H$ ). The optimization algorithm is thus as follows (this is the subgradient method):

- **Initialization:** Choose discretization order  $k$ , maximum number of iterations  $T$ , step-size  $\gamma$ , and set  $\rho_{ij}^0 = 1/2$  for all  $(i, j)$
- **Subgradient iterations:** for  $t = 1$  to  $T$ ,
  - Compute a subgradient  $w^{t-1} \in \mathbb{R}^{n \times (k-1)}$  of  $f_\downarrow$  at  $\rho^{t-1}$  using the greedy algorithm of [2]
  - Take a step  $\tilde{\rho}^t = \rho^{t-1} - \frac{\gamma}{\sqrt{t}} w^{t-1}$
  - Compute the projection  $\rho^t$  of  $\tilde{\rho}^t$  onto  $[0, 1]^n \cap \mathcal{S} \cap \mathcal{T}$  using any parametric max-flow algorithm (this is an isotonic regression problem with quadratic cost)
- **Output:**  $(\frac{i_1}{k-1}, \dots, \frac{i_n}{k-1})$  such that  $(i_1, \dots, i_n)$  leads to the maximal value of  $F(i_1, \dots, i_n)$  in the greedy algorithm for computing  $w^T$ .

**Strongly-convex subgradient method.** Here, we minimize  $f_\downarrow(\rho) + \frac{1}{2} \|\rho\|_F^2$  with respect to  $\rho \in \mathcal{S} \cap \mathcal{T}$ , with the following subgradient method with an explicit step-size for strongly-convex problems (Frank-Wolfe could also be used for the dual problem):

- **Initialization:** Choose discretization order  $k$ , maximum number of iterations  $T$ , and set  $\rho_{ij}^0 = 0$  for all  $(i, j)$
- **Subgradient iterations:** for  $t = 1$  to  $T$ ,
  - Compute a subgradient  $w^{t-1} \in \mathbb{R}^{n \times (k-1)}$  of  $f_\downarrow$  at  $\rho^{t-1}$  using the greedy algorithm of [2]
  - Take a step  $\tilde{\rho}^t = (1 - \frac{2}{t+1})\rho^{t-1} - \frac{2}{t+1}w^{t-1}$
  - Compute the projection  $\rho^t$  of  $\tilde{\rho}^t$  onto  $\mathcal{S} \cap \mathcal{T}$  using any parametric max-flow algorithm (this is an isotonic regression problem with quadratic cost)
- **Output:**  $(\frac{i_1}{k-1}, \dots, \frac{i_n}{k-1})$  such that  $(i_1, \dots, i_n)$  leads to the maximal value of  $F(i_1, \dots, i_n)$  in the greedy algorithm for computing  $w^T$ .

## B.2 Improve discretization scheme

We are still here minimizing a function on  $\{0, \dots, k-1\}^n$ , but this time we aim at minimizing with respect to  $z \in \{0, \dots, k-1\}^n \cap \mathcal{X}$  the submodular function

$$\tilde{H}(z) = \min_{x \in \prod_{i=1}^n A_{z_i}} H(x) \text{ such that } \forall (i, j) \in E, x_i \geq x_j,$$

where  $A_0 = [0, \frac{1}{k})$ ,  $A_1 = [\frac{1}{k}, \frac{2}{k})$ ,  $\dots$ ,  $A_{k-1} = [\frac{k-1}{k}, 1]$ . It can be approximated using a Taylor expansion by

$$\hat{H}(z) = \min_{x \in \prod_{i=1}^n A_{z_i}} H(\frac{z+1/2}{k}) + \sum_{r=1}^{q-1} \sum_{|\alpha|=r} \frac{1}{\alpha!} (x - \frac{z+1/2}{k})^\alpha H^{(\alpha)}(\frac{z+1/2}{k}) \text{ s. t. } \forall (i, j) \in E, x_i \geq x_j,$$

which only requires accesses to  $H$  and its derivatives at  $\frac{z+1/2}{k}$ . This is trivial for  $q = 1$ , and can be approximated by a semidefinite program for  $q = 2$  (see Section 5.2). We can then apply the subgradient method to  $\hat{H}$  as follows:

- **Initialization:** Choose discretization order  $k$ , maximum number of iterations  $T$ , step-size  $\gamma$  and set  $\rho_{ij}^0 = 1/2$  for all  $(i, j)$ ,
- **Subgradient iterations:** for  $t = 1$  to  $T$ ,
  - Compute a subgradient  $w^{t-1} \in \mathbb{R}^{n \times (k-1)}$  of  $\hat{h}_\downarrow$  at  $\rho^{t-1}$  using the greedy algorithm of [2]
  - Take a step  $\tilde{\rho}^t = \rho^{t-1} - \frac{\gamma}{\sqrt{t}} w^{t-1}$
  - Compute the projection  $\rho^t$  of  $\tilde{\rho}^t$  onto  $[0, 1]^n \cap \mathcal{S} \cap \mathcal{T}$  using any parametric max-flow algorithm (this is an isotonic regression problem with quadratic cost)
- **Output:**  $(\frac{i_1+1/2}{k}, \dots, \frac{i_n+1/2}{k})$  such that  $(i_1, \dots, i_n)$  leads to the maximal value of  $\hat{H}(i_1, \dots, i_n)$  in the greedy algorithm for computing  $w^T$ .

## C Additional experimental results

We first present here additional results, for robustness of isotonic regression to corrupted data in Figure 4, where we show that up to 75% of corrupted data, the non-convex loss (solved exactly using submodularity) still finds a reasonable answer (but does not for 90% of corruption). Then, in Figure 5, we present the effect of adding a smoothness term on top of isotonic constraints: we indeed get a smoother function as expected, and the higher-order algorithms perform significantly better.

## D Approximate optimization for high-order discretization

In this section, we consider the set-up of Section 5, and we consider the minimization of the extension  $\tilde{h}_\downarrow$  on  $\mathcal{S} \cap \mathcal{T} \cap [0, 1]^{n \times (k-1)}$ . We consider the projected subgradient method, which uses an approximate subgradient not from  $\tilde{h}_\downarrow$  but from the approximation  $\hat{h}_\downarrow$ , which we know is obtained from a function  $\hat{H}$  such that  $|\hat{H}(z) - \tilde{H}(z)| \leq \eta$  for all  $z$ , and for  $\eta = (nL_q/2k)^q/q!$ .

The main issue is that the extension  $\hat{h}_\downarrow$  is not convex when  $\hat{H}$  is not submodular (which could be the case because it is only an approximation of a submodular function). In order to show that the same projected subgradient method converges to an  $\eta$ -minimizer of  $\tilde{h}_\downarrow$  (and hence of  $\tilde{H}$ ), we simply consider a minimizer  $\rho^*$  of  $\tilde{h}_\downarrow$  (which is convex) on  $\mathcal{S} \cap \mathcal{T} \cap [0, 1]^{n \times (k-1)}$ . Because of properties of submodular optimization problems, we may choose  $\rho^*$  so that it takes values only in  $\{0, 1\}^{n \times (k-1)}$ .

At iteration  $t$ , given  $\rho^{t-1} \in \mathcal{S} \cap \mathcal{T} \cap [0, 1]^{n \times (k-1)}$ , we compute an approximate subgradient  $\hat{w}^{t-1}$  using the greedy algorithm of [2] applied to  $\hat{w}^{t-1}$ . This leads to a sequence of indices  $(i(s), j(s)) \in \{1, \dots, n\} \times \{0, \dots, k-1\}$  and elements  $z^s \in \{0, \dots, k-1\}^n$  so that

$$\hat{h}_\downarrow(\rho^{t-1}) - \hat{H}(0) = \langle \hat{w}^{t-1}, \rho^{t-1} \rangle = \sum_{s=1}^{n(k-1)} \rho_{i(s)j(s)} [\hat{H}(z^s) - \hat{H}(z^{s-1})],$$

where all  $\rho_{i(s)j(s)}$  are arranged in non-increasing order. Because  $\hat{h}_\downarrow$  and  $\tilde{h}_\downarrow$  are defined as expectations of evaluations of  $\hat{H}$  and  $\tilde{H}$ , they differ from at most  $\eta$ . We denote by  $\tilde{w}^{t-1}$  the subgradient obtained from  $\tilde{H}$ .

We consider the iteration  $\rho^t = \Pi_{\mathcal{S} \cap \mathcal{T} \cap [0, 1]^{n \times (k-1)}}(\rho^{t-1} - \gamma \hat{w}^{t-1})$ , where  $\Pi_{\mathcal{S} \cap \mathcal{T} \cap [0, 1]^{n \times (k-1)}}$  is the orthogonal projection on  $\mathcal{S} \cap \mathcal{T} \cap [0, 1]^{n \times (k-1)}$ . From the usual subgradient convergence proof (see, e.g., [23]), we have:

$$\begin{aligned} \|\rho^t - \rho^*\|_F^2 &\leq \|\rho^{t-1} - \rho^*\|_F^2 - 2\gamma \langle \rho^{t-1} - \rho^*, \hat{w}^{t-1} \rangle + \gamma^2 \|\hat{w}^{t-1}\|_F^2 \\ &\leq \|\rho^{t-1} - \rho^*\|_F^2 - 2\gamma \langle \rho^{t-1} - \rho^*, \tilde{w}^{t-1} \rangle + \gamma^2 B^2 \\ &= \|\rho^{t-1} - \rho^*\|_F^2 - 2\gamma [\hat{h}_\downarrow(\rho^{t-1}) - \hat{H}(0)] + 2\gamma \langle \rho^*, \hat{w}^{t-1} \rangle + \gamma^2 B^2, \end{aligned}$$

using the bound  $\|\hat{w}^{t-1}\|_F^2 \leq B^2 \leq nk[L_1/k + 2(nL_q/k)^q/q!]$ . Moreover, we have

$$\langle \rho^*, \hat{w}^{t-1} \rangle = \langle \rho^*, \hat{w}^{t-1} - \tilde{w}^{t-1} \rangle + \tilde{h}_\downarrow(\rho^*) - \tilde{H}(0).$$

Since  $\rho^* \in \{0, 1\}^n$ , there is a single element  $s$  so that  $\rho_{i(s)j(s)} - \rho_{i(s+1)j(s+1)}$  is different from zero, and thus  $\langle \rho^*, \hat{w}^{t-1} - \tilde{w}^{t-1} \rangle$  is the difference between two function values of  $\tilde{H}$  and  $\hat{H}$ . Thus overall, we get:

$$\|\rho^t - \rho^*\|_F^2 \leq \|\rho^{t-1} - \rho^*\|_F^2 - 2\gamma [\tilde{h}_\downarrow(\rho^{s-1}) - \tilde{h}_\downarrow(\rho^*) - 2\eta] + \gamma^2 B^2,$$

which leads to the usual bound for the projected subgradient method, with an extra  $2\eta$  factor, as if (up to the factor of 2)  $\tilde{H}$  was submodular.

## E Quadratic submodular functions

In this section, we consider the case where the function  $H$  is a second-order polynomial, as described in Section 5.2 of the main paper.

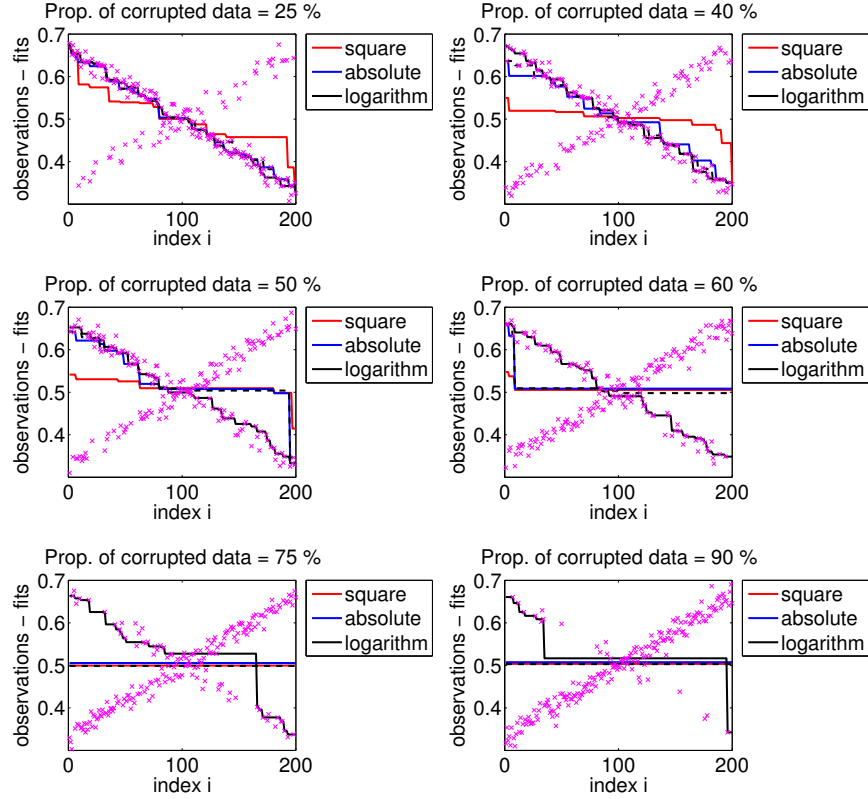

Figure 4: Robust isotonic regression with decreasing constraints (observation in pink crosses, and results of isotonic regression with various losses in red, blue and black), from 25% to 90% of corrupted data. The dashed black line corresponds to majorization-minimization algorithm started from the observations.

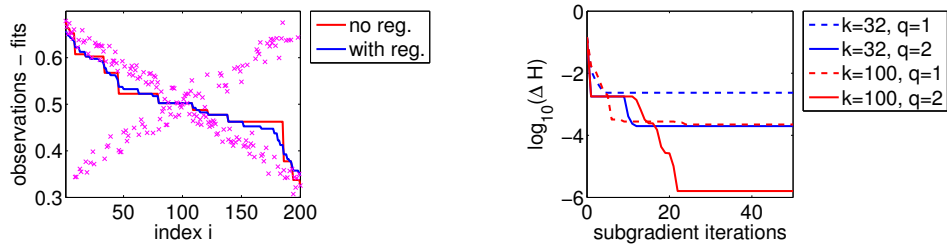

Figure 5: Left: Effect of adding additional regularization ( $n = 200$ ). Right: Non-separable problems ( $n = 25$ ), distance to optimality in function values (and log-scale) for two discretization values ( $k = 32$  and  $k = 100$ ) and two orders of approximation ( $q = 1$  and  $q = 2$ ).

## E.1 Without isotonic constraints

We first consider the program without isotonic constraints, which is the convex program outlined in Section 5.2. Let  $(Y, y)$  be a solution of the following minimization problem, where  $\text{diag}(A) = 0$  and  $A \preceq 0$ :

$$\begin{aligned} \min_{Y, y} \quad & \frac{1}{2} \text{tr}(A + \text{Diag}(b))Y + c^\top y \quad \text{such that} \quad \forall i, Y_{ii} \leq y_i \\ & \forall i \neq j, Y_{ij} \leq y_i, Y_{ij} \leq y_j, \\ & \forall i \neq j, \begin{pmatrix} Y_{ii} & Y_{ij} & y_i \\ Y_{ij} & Y_{jj} & y_j \\ y_i & y_j & 1 \end{pmatrix} \succeq 0. \end{aligned}$$

Some subcases are worth considering, showing that it is tight in these situations, that is, (a) the optimal values are the same as minimizing  $H(x)$  and (b) one can recover an optimal  $x \in [0, 1]^n$  from a solution of the problem above:

- **“Totally” submodular:** if  $c \leq 0$ , then, following [18], if we take  $\mathcal{Y}_{\text{SDP}} = \{(Y, y), \forall i \neq j, Y_{ij}^2 \leq Y_{ii}Y_{jj}, \forall i, y_i^2 \leq Y_{ii} \leq 1, y_i \geq 0\}$ , then by considering any minimizer  $(Y, y) \in \mathcal{Y}_{\text{SDP}}$  and taking  $x = \text{diag}(Y)^{1/2} \in [0, 1]^n$  (point-wise square root), we have  $H(x) = \frac{1}{2}b^\top \text{diag}(Y) + \frac{1}{2} \sum_{i \neq j} A_{ij} Y_{ii}^{1/2} Y_{jj}^{1/2} + \sum_i c_i Y_{ii}^{1/2}$ , and since  $A_{ij} \leq 0$  and  $c_i \leq 0$ , it is less than  $\text{tr} Y(A + \text{Diag}(b)) + c^\top y \leq \inf_{x \in [0, 1]^n} H(x)$ , and thus  $x$  is a minimizer.
- **Combinatorial:** if  $b \leq 0$ , then we have:  $H(x) = \sum_{i \neq j} A_{ij} x_i x_j + \frac{1}{2} \sum_{i=1}^n (-b_i) x_i (1 - x_i) + (c + b/2)^\top x$ . Since  $x_i x_j \leq \inf\{x_i, x_j\}$ ,  $A_{ij} \leq 0$ ,  $x_i(1 - x_i) \geq 0$  and  $b_i \leq 0$ , we have

$$\inf_{x \in [0, 1]^n} H(x) \geq \inf_{x \in [0, 1]^n} \sum_{i \neq j} A_{ij} \inf\{x_i, x_j\} + (c + b/2)^\top x.$$

Since the problem above is the Lovász extension of a submodular function the infimum may be restricted to  $\{0, 1\}^n$ . Since for such  $x$ ,  $x_i x_j = \inf\{x_i, x_j\}$  and  $x_i(1 - x_i) = 0$ , this is the infimum of  $H(x)$  on  $\{0, 1\}^n$ , which is itself greater than (or equal) to the infimum on  $[0, 1]^n$ . Thus, all infima are equal. Therefore, the usual linear programming relaxation, with  $\mathcal{Y}_{\text{LP}} = \{(Y, y), \forall i \neq j, Y_{ij} \leq \inf\{y_i, y_j\}, \forall i, Y_{ii} \leq y_i, 0 \leq y_i \leq 1\}$  is tight. We can get a candidate  $x \in \{0, 1\}^n$  by simple rounding.

- **Convex:** if  $A + \text{Diag}(b) \succeq 0$ , we can use the relaxation  $\{(Y, y), Y \succeq yy^\top, y \in [0, 1]^n\}$  (which trivially leads to a solution with  $x = y$ ). But we can also consider the relaxation  $\mathcal{Y}_{\text{cvx}} = \{(Y, y), \forall i \neq j, \begin{pmatrix} Y_{ii} - y_i^2 & Y_{ij} - y_i y_j \\ Y_{ij} - y_i y_j & Y_{jj} - y_j^2 \end{pmatrix} \succeq 0, \forall i, Y_{ii} \leq y_i\}$ . We have then

$$\begin{aligned} \frac{1}{2} \text{tr}(A + \text{Diag}(b))Y + y^\top c &= \frac{1}{2} \sum_{i \neq j} A_{ij} (Y_{ij} - y_i y_j) \\ &\quad + \frac{1}{2} \sum_i b_i (Y_{ii} - y_i^2) + y^\top c + \frac{1}{2} y^\top (A + \text{Diag}(b))y \\ &= \frac{1}{2} \sum_{i \neq j} A_{ij} \sqrt{Y_{ii} - y_i^2} \sqrt{Y_{jj} - y_j^2} \\ &\quad + \frac{1}{2} \sum_i b_i (Y_{ii} - y_i^2) + y^\top c + \frac{1}{2} y^\top (A + \text{Diag}(b))y, \end{aligned}$$

once we minimize with respect to  $Y_{ij}$ , from which we have, since  $A_{ij} \leq 0$ ,  $Y_{ij} = y_i y_j + \sqrt{Y_{ii} - y_i^2} \sqrt{Y_{jj} - y_j^2}$ . If we denote  $\sigma_i = \sqrt{Y_{ii} - y_i^2}$ , we get an objective function equal to  $\frac{1}{2} \sigma^\top (A + \text{Diag}(b)) \sigma + \frac{1}{2} y^\top (A + \text{Diag}(b)) y + c^\top y$ , which is minimized when  $\sigma = 0$  and thus  $y$  is a minimizer of the original problem.

## E.2 Counter-example

By searching randomly among problems with  $n = 3$ , and obtaining solutions by looking at all  $3^n = 3^3 = 27$  patterns for the  $n$  variables being 0, 1 and in  $(0, 1)$ , for the following function:

$$H(x_1, x_2, x_3) = \frac{1}{200} \begin{pmatrix} x_1 \\ x_2 \\ x_3 \end{pmatrix}^\top \begin{pmatrix} -193 & -100 & -100 \\ -100 & 317 & -100 \\ -100 & -100 & -45 \end{pmatrix} \begin{pmatrix} x_1 \\ x_2 \\ x_3 \end{pmatrix} + \frac{1}{100} \begin{pmatrix} x_1 \\ x_2 \\ x_3 \end{pmatrix}^\top \begin{pmatrix} -146 \\ 136 \\ -216 \end{pmatrix},$$

the global optimum is  $\begin{pmatrix} x_1 \\ x_2 \\ x_3 \end{pmatrix} \approx \begin{pmatrix} 1 \\ 0.7445 \\ 0 \end{pmatrix}$ , the minimal value of  $H$  is approximately  $-0.3835$ ,

while the optimal value of the semidefinite program is  $-0.3862$ . This thus provides a counter-example.

## E.3 With isotonic constraints

We consider the extra constraints: for all  $(i, j) \in E$ ,  $y_i \geq y_j$ ,  $Y_{ii} \geq Y_{jj}$ ,  $Y_{ij} \geq \max\{Y_{jj}, y_j - y_i + Y_{ii}\}$  and  $Y_{ij} \leq \max\{Y_{ii}, y_i - y_j + Y_{jj}\}$ , which corresponds to  $x_i \geq x_j$ ,  $x_i^2 \geq x_j^2$ ,  $x_i x_j \geq x_j^2$ ,  $x_i(1 - x_i) \leq x_i(1 - x_j)$ ,  $x_i x_j \leq x_i^2$ , and  $x_i(1 - x_j) \geq x_j(1 - x_j)$ .

In the three cases presented above, the presence of isotonic constraints leads to the following modifications:

- “Totally” submodular: because of the extra constraints  $Y_{ii} \geq Y_{jj}$ , for all  $(i, j) \in E$ , the potential solution  $x = \text{diag}(Y)^{1/2}$  satisfies the isotonic constraint and hence we get a global optimum.
- Combinatorial: nothing is changed, the solution is constrained to be in  $\{0, 1\}^n$  with the extra isotonic constraint, implied by  $y_i \leq y_j$ , for all  $(i, j) \in E$ .
- Convex: the original problem is still a convex problem where the constraints  $y_i \leq y_j$ , for all  $(i, j) \in E$ , are sufficient to impose the isotonic constraints.
